# Supplementary material
Source: Springer Nature journal article supplement (https://www.springermedizin.de/resource/supplementary/12879_2014_3684_MOESM2_ESM.pdf/9446458)

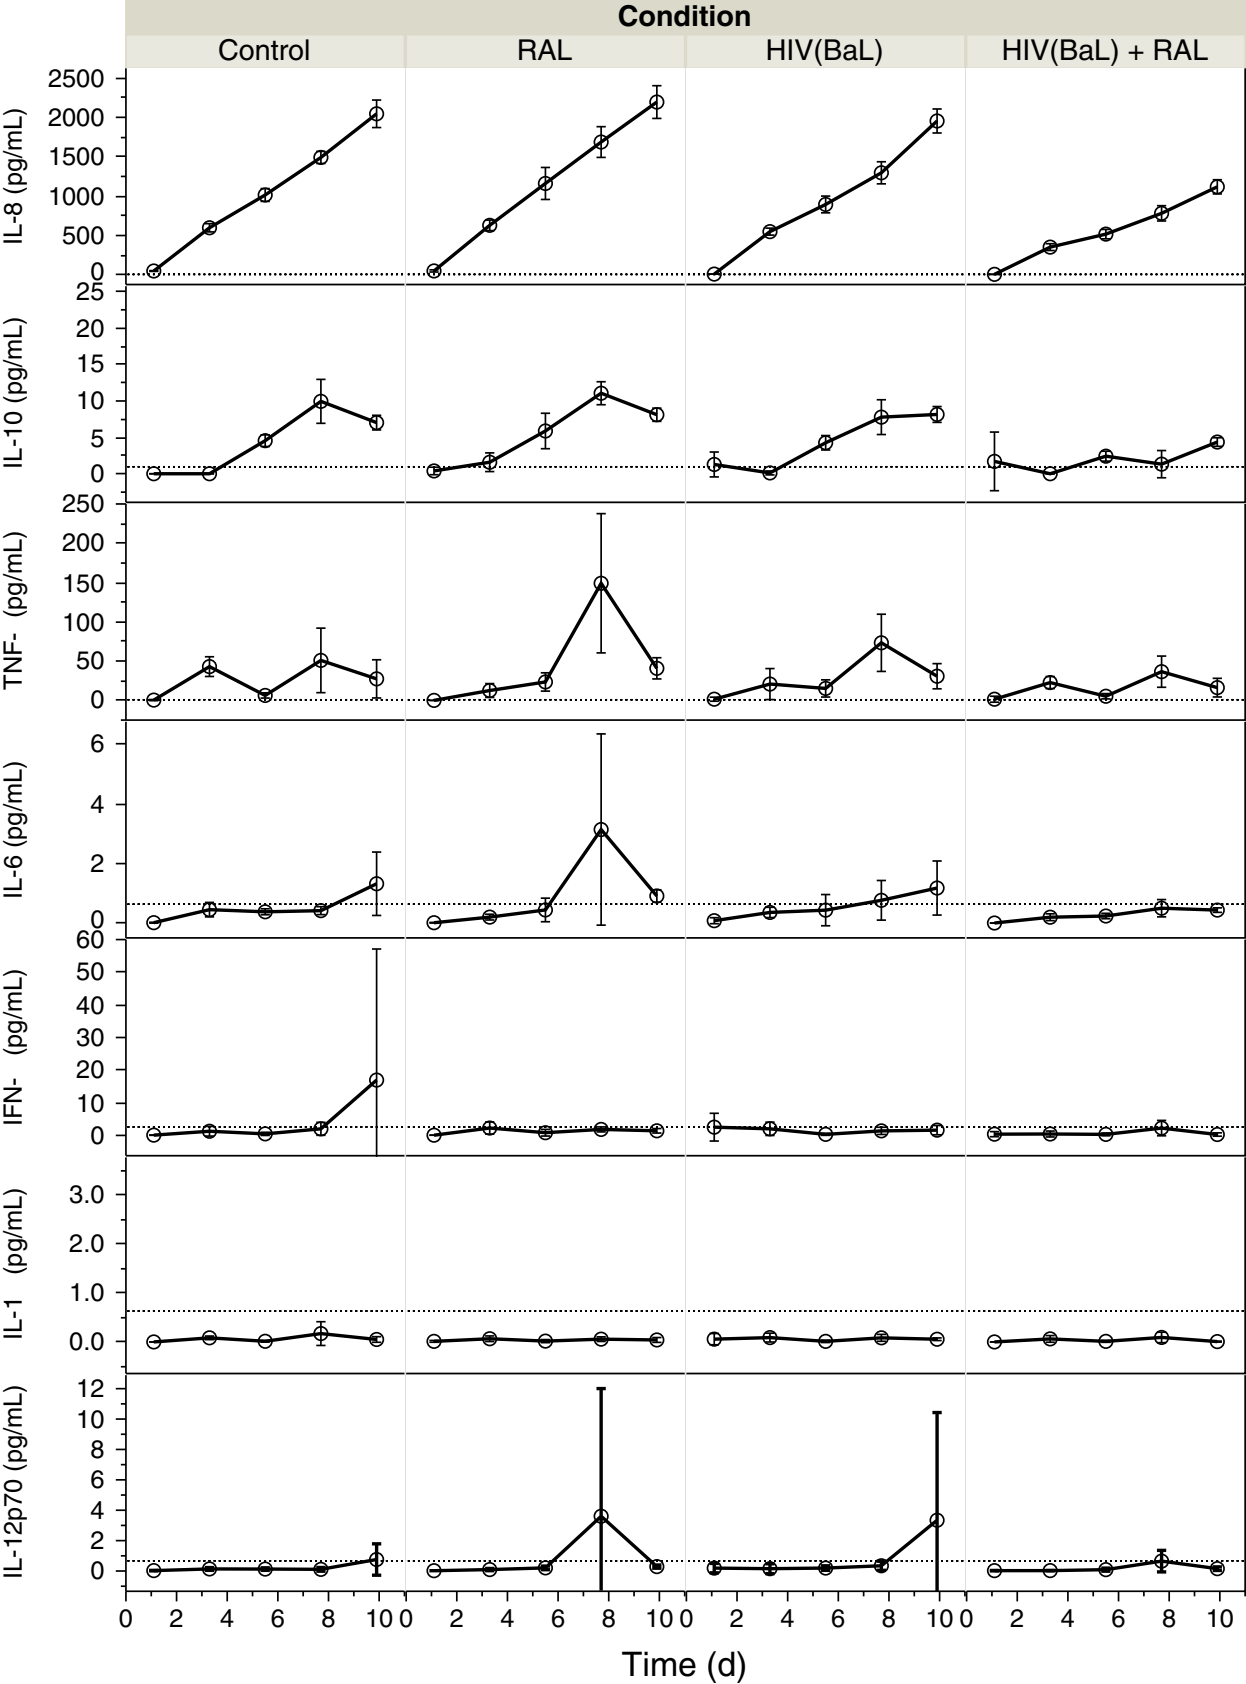

Supplement: MOESM2 [file 9446458]
